# Supplementary material for: Constructing gene co-expression networks and predicting functions of unknown genes by random matrix theory
Source: PubMed Central journal article supplement (PMC2212665; doi:10.1186/1471-2105-8-299), 2007-08-14
Supplement: 1471-2105-8-299-S2.pdf [file 1471-2105-8-299-S2.pdf]

## SUPPLEMENTAL TABLES

**Table S1: Functional predictions of unknown genes from yeast cell cycling dataset.**

| Systematic name | Syn    | Predicted biological pathway/localization                      | Baikai's modules (2, 4) | Other predictions | SGD information                                                                                                                                                                 | # of Links |
|-----------------|--------|----------------------------------------------------------------|-------------------------|-------------------|---------------------------------------------------------------------------------------------------------------------------------------------------------------------------------|------------|
| YBL051C         | PIN4   | cytoplasmic, protein fate (folding, modification, destination) |                         |                   | cytoplasmic; mdt1, modulate DNA damage tolerance and G2/M cell cycle                                                                                                            | 2          |
| YBR108W         |        | cytoplasmic, protein fate (folding, modification, destination) | not present             |                   | synthetic sick with gim3,5, components of bovine prefoldin for tubulin folding and cytokinesis                                                                                  | 3          |
| YBR124W         |        | cytoplasmic, protein fate (folding, modification, destination) | not present             |                   |                                                                                                                                                                                 | 2          |
| YDR134C         |        | amino acid biosynthesis or energy transport                    | not present             |                   |                                                                                                                                                                                 | 1          |
| YOR248W         |        | cytoplasmic, protein fate (folding, modification, destination) | cell cycle; module 63   |                   |                                                                                                                                                                                 | 2          |
| YPL067C         |        | cytoplasmic, protein fate (folding, modification, destination) | module 59               |                   |                                                                                                                                                                                 | 1          |
| YKL153W         |        | gluconeogenesis                                                | module 60: glycolysis   |                   |                                                                                                                                                                                 | 1          |
| YCR013C         |        | gluconeogenesis                                                | module 60: glycolysis   |                   |                                                                                                                                                                                 | 5          |
| YDR279W         | RNH202 | cell cycle or cell fate                                        | cell cycle; module 13   |                   | ribonuclease H2 subunit for DNA replication                                                                                                                                     | 2          |
| YGR086C         | PIL1   | cell cycle                                                     | module 24               | cell cycle (3);   |                                                                                                                                                                                 | 1          |
| YGR151C         |        | cell cycle                                                     | cell cycle; module 15   |                   | synthetic lethal to Cde42p                                                                                                                                                      | 12         |
| YGR189C         | CRH1   | cell cycle                                                     | cell cycle; module 63   |                   | Putative glycosidase of the cell wall, may have a role in cell wall architecture                                                                                                | 5          |
| YGR221C         | TOS2   | cell cycle                                                     | cell cycle; module 63   |                   | Protein of unknown function that localizes to the bud neck and bud tip; potentially phosphorylated by Cdc28p                                                                    | 12         |
| YBR070C         |        | cell cycle                                                     | cell cycle; module 77   |                   |                                                                                                                                                                                 | 3          |
| YBR071W         |        | cell cycle                                                     | cell cycle; module 77   | cell cycle (3);   |                                                                                                                                                                                 | 1          |
| YHR098C         | SFB3   | metabolism                                                     |                         |                   | Member of the Sec24p family; forms a complex, with Sec23p, that is involved in sorting of Pma1p into COPII vesicles; peripheral ER membrane protein; potential Cdc28p substrate | 1          |
| YHR149C         |        | cell cycle                                                     | cell cycle; module 77   |                   | Protein of unknown function found in the bud tip and bud                                                                                                                        | 1          |

|         |        |                           |                                   |                |                                                                                                                                                                  |    |
|---------|--------|---------------------------|-----------------------------------|----------------|------------------------------------------------------------------------------------------------------------------------------------------------------------------|----|
|         |        |                           |                                   |                | neck, potential Cdc28p substrate                                                                                                                                 |    |
| YBR089W |        | cell cycle                | cell cycle;<br>module 77          |                |                                                                                                                                                                  | 9  |
| YIL158W |        | cell cycle                | module 40                         |                |                                                                                                                                                                  | 6  |
| YJL051W |        | cell cycle                | module 63                         |                | localized to the bud tip                                                                                                                                         | 6  |
| YJL181W |        | cell cycle                | cell cycle;<br>module 77          |                |                                                                                                                                                                  | 3  |
| YKR012C |        | cell cycle                | mating;<br>module 77              |                |                                                                                                                                                                  | 3  |
| YKR013W | PRY2   | cell cycle                | cell cycle;<br>module 82          |                |                                                                                                                                                                  | 9  |
| YKR077W |        | cell cycle                | cell cycle;<br>module 82          |                |                                                                                                                                                                  | 2  |
| YKR090W | PXL1   | cell cycle                | cell cycle;<br>module 82          |                | required for selection and/or maintenance of polarized growth sites, may modulate signaling by the GTPases Cdc42p and Rho1p; has similarity to metazoan paxillin | 1  |
| YLL022C | HIF1   | cell cycle                | cell cycle;<br>module 82          |                | Non-essential component of the HAT-B histone acetyltransferase complex (Hat1p-Hat2p-Hif1p), localized to the nucleus; has a role in telomeric silencing          | 14 |
| YLR049C |        | cell cycle                | cell cycle;<br>module 85          |                |                                                                                                                                                                  | 3  |
| YLR154C | RNH203 | cell cycle                | cell cycle                        |                | Ribonuclease H2 subunit, required for RNase H2 activity                                                                                                          | 1  |
| YLR183C | TOS4   | cell cycle                | cell cycle;<br>module 36          |                | Transcription factor; promoters of some genes involved in pheromone response and cell cycle;                                                                     | 25 |
| YLR190W | MMR1   | cytokinesis               | module 63:<br>cell wall integrity |                | localized to small buds, bud neck, and incipient bud sites; mRNA is targeted to the bud via the mRNA transport system involving She2p                            | 11 |
| YML119W |        | cell cycle                | module 47                         |                | potential Cdc28p substrate                                                                                                                                       | 10 |
| YMR031C |        | metabolism                | not present                       |                |                                                                                                                                                                  | 1  |
| YCL012W |        | cytokinesis or cell cycle | module 64                         |                |                                                                                                                                                                  | 1  |
| YCL013W |        | cytokinesis or cell cycle | module 64                         |                | "=YCL012W"                                                                                                                                                       | 1  |
| YNL058C |        | cell cycle                | module 42                         | Cell cycle (1) | potential Cdc28p substrate                                                                                                                                       | 6  |
| YCL022C |        | cell cycle                | cell cycle;<br>module 13          |                |                                                                                                                                                                  | 5  |
| YOL007C |        | cell cycle                | cell cycle;<br>module 82          |                | structural component of the chitin synthase 3 complex                                                                                                            | 19 |
| YOL017W | ESC8   | cell cycle                | cell cycle;<br>module 77          |                | Protein involved in telomeric and mating-type locus silencing, interacts with Sir2p and also interacts with the Gal11p, which is a component                     | 19 |

|         |       |                          |                                     |  |                                                                                                                                                                                                                                                |    |
|---------|-------|--------------------------|-------------------------------------|--|------------------------------------------------------------------------------------------------------------------------------------------------------------------------------------------------------------------------------------------------|----|
|         |       |                          |                                     |  | of the RNA pol II mediator complex                                                                                                                                                                                                             |    |
| YOL019W |       | cell cycle               | cell cycle;<br>module 82            |  |                                                                                                                                                                                                                                                | 4  |
| YCL060C |       | cell cycle               | cell cycle;<br>module 13;<br>15; 77 |  | S-phase checkpoint protein found at replication forks, required for DNA replication; also required for Rad53p activation during DNA replication stress, where it forms a replication-pausing complex with Tof1p and is phosphorylated by Mec1p | 10 |
| YOR066W |       | cell cycle               | module 42                           |  | potential Cdc28p substrate                                                                                                                                                                                                                     | 2  |
| YOR112W |       | metabolism               | not present                         |  |                                                                                                                                                                                                                                                | 1  |
| YPL208W |       | cell cycle               | cell cycle;<br>module 77            |  |                                                                                                                                                                                                                                                | 7  |
| YPR174C |       | cell cycle               | cell cycle;<br>module 82            |  | potential Cdc28p substrate                                                                                                                                                                                                                     | 15 |
| YDL157C |       | cell cycle               | cell cycle                          |  |                                                                                                                                                                                                                                                | 1  |
| YLL064C |       | stress response          | not present                         |  |                                                                                                                                                                                                                                                | 2  |
| YKL177W |       | cell differentiation     | not present                         |  |                                                                                                                                                                                                                                                | 1  |
| YPL158C |       | cytokinesis or cell fate | module 42                           |  |                                                                                                                                                                                                                                                | 2  |
| YDL117W | CYK3  | cytokinesis              | module 42                           |  | SH3-domain protein located in the mother-bud neck and the cytokinetic actin ring; mutant phenotype and genetic interactions suggest a role in cytokinesis                                                                                      | 1  |
| YOR135C |       | energy transport         | module 21                           |  | exhibits growth defect on a non-fermentable (respiratory) carbon source                                                                                                                                                                        | 3  |
| YDR361C | BCP1  | ribosome biogenesis      | protein synthesis                   |  |                                                                                                                                                                                                                                                | 9  |
| YDR413C |       | ribosome biogenesis      | not present                         |  |                                                                                                                                                                                                                                                | 3  |
| YDR417C |       | protein synthesis        | protein synthesis                   |  |                                                                                                                                                                                                                                                | 5  |
| YDR494W | RSM28 | mitochondrial protein    | module 12                           |  | Mitochondrial ribosomal protein of the small subunit                                                                                                                                                                                           | 5  |
| YGL102C |       | protein synthesis        | protein synthesis                   |  |                                                                                                                                                                                                                                                | 5  |
| YGR123C | PPT1  | ribosome biogenesis      | protein synthesis                   |  | Protein serine/threonine phosphatase with similarity to human phosphatase PP5                                                                                                                                                                  | 8  |
| YGR173W | GIR1  | ribosome biogenesis      | protein synthesis                   |  | GTPase, interacts with ribosomes                                                                                                                                                                                                               | 5  |
| YGR187C | HGH1  | ribosome biogenesis      | protein synthesis                   |  |                                                                                                                                                                                                                                                | 2  |
| YBR056W |       | metabolism               | stress                              |  |                                                                                                                                                                                                                                                | 5  |
| YGR248W | SOL4  | metabolism               | stress;<br>module 34                |  | 6-phosphogluconolactonase activity by sequence analysis                                                                                                                                                                                        | 1  |
| YHL021C | FMP12 | stress response          | stress;<br>module 34                |  |                                                                                                                                                                                                                                                | 8  |
| YHR052W | CIC1  | ribosome biogenesis      | protein                             |  |                                                                                                                                                                                                                                                | 2  |

|         |       |                                           |                                 |  |                                                                                                                                                                                                                  |    |
|---------|-------|-------------------------------------------|---------------------------------|--|------------------------------------------------------------------------------------------------------------------------------------------------------------------------------------------------------------------|----|
|         |       |                                           | synthesis;<br>module 10         |  |                                                                                                                                                                                                                  |    |
| YHR116W |       | mitochondrial protein                     | module 12                       |  | Protein that functions in mitochondrial copper homeostasis and is essential for functional cytochrome oxidase expression; homologous to COX17, localized to the mitochondrial intermembrane space                | 1  |
| YIL127C |       | ribosome biogenesis                       | protein synthesis               |  |                                                                                                                                                                                                                  | 26 |
| YJL009W |       | ribosome biogenesis                       | not present                     |  |                                                                                                                                                                                                                  | 1  |
| YJL122W |       | ribosome biogenesis                       | protein synthesis               |  |                                                                                                                                                                                                                  | 23 |
| YKL030W |       | mitochondrial protein                     | not present                     |  |                                                                                                                                                                                                                  | 1  |
| YKL169C |       | mitochondrial protein                     | module 12                       |  |                                                                                                                                                                                                                  | 1  |
| YAL036C | FUN11 | ribosome biogenesis                       | protein synthesis               |  | RiBosome interacting Gtpase                                                                                                                                                                                      | 6  |
| YKR016W | FMP13 | respiration                               | module 5:<br>energy transport   |  |                                                                                                                                                                                                                  |    |
| YKR047W |       | protein synthesis                         | not present                     |  | synthetic lethal to Bni1p involved in spindle formation                                                                                                                                                          | 1  |
| YLL037W |       | metabolism                                | not present                     |  |                                                                                                                                                                                                                  | 2  |
| YLR016C |       | ribosome biogenesis                       | not present                     |  |                                                                                                                                                                                                                  | 1  |
| YLR051C |       | ribosome biogenesis                       | protein synthesis               |  |                                                                                                                                                                                                                  | 3  |
| YLR062C | BUD28 | protein synthesis                         | protein synthesis               |  |                                                                                                                                                                                                                  | 2  |
| YLR074C | BUD20 | ribosome biogenesis                       | protein synthesis               |  | Protein involved in bud-site selection; diploid mutants display a random budding pattern instead of the wild-type bipolar pattern                                                                                | 11 |
| YLR090W | XDJ1  | mitochondrial protein                     | not present                     |  | mitochondrial protein                                                                                                                                                                                            | 2  |
| YLR149C |       | metabolism                                | stress;<br>module 37            |  |                                                                                                                                                                                                                  | 1  |
| YLR196W | PWP1  | ribosome biogenesis                       | protein synthesis;<br>module 10 |  | nucleolar protein                                                                                                                                                                                                | 16 |
| YLR198C |       | ribosome biogenesis                       | protein synthesis               |  |                                                                                                                                                                                                                  | 2  |
| YLR217W |       | protein chaperone, response to heat shock | module 50:<br>protein chaperone |  |                                                                                                                                                                                                                  | 1  |
| YLR221C | RSA3  | ribosome biogenesis                       | protein synthesis               |  | Protein with a likely role in ribosomal maturation, required for accumulation of wild-type levels of large (60S) ribosomal subunits; binds to the helicase Dbp6p in pre-60S ribosomal particles in the nucleolus | 13 |
| YLR257W |       | mitochondrial protein                     | not present                     |  |                                                                                                                                                                                                                  | 1  |

|         |       |                       |                                 |  |                                                                                                                                                                                                                               |    |
|---------|-------|-----------------------|---------------------------------|--|-------------------------------------------------------------------------------------------------------------------------------------------------------------------------------------------------------------------------------|----|
| YLR270W | DCS1  | metabolism            | stress                          |  | interact with stress response protein Nth1p                                                                                                                                                                                   | 1  |
| YLR339C |       | protein synthesis     | module 70                       |  |                                                                                                                                                                                                                               | 2  |
| YLR397C | AFG2  | ribosome biogenesis   | module 71                       |  | ATPase of the CDC48/PAS1/SEC18 (AAA) family, forms a hexameric complex; may be involved in degradation of aberrant mRNAs                                                                                                      | 4  |
| YLR449W | FPR4  | ribosome biogenesis   | protein synthesis               |  | Nuclear protein, putative peptidyl-prolyl cis-trans isomerase (PPIase) with similarity to Fpr3p; overproduction suppresses the growth defect resulting from the absence of E3 ubiquitin-protein ligase Tom1p                  | 18 |
| YBR266C |       | ribosome biogenesis   | protein synthesis               |  | endocytosis                                                                                                                                                                                                                   | 4  |
| YBR271W |       | ribosome biogenesis   | protein synthesis               |  |                                                                                                                                                                                                                               | 4  |
| YML128C | MSC1  | metabolism            | stress;<br>module 34            |  | mutant has sporulation defect                                                                                                                                                                                                 | 1  |
| YMR014W | BUD22 | ribosome biogenesis   | protein synthesis               |  | Protein involved in bud-site selection                                                                                                                                                                                        | 19 |
| YMR269W |       | ribosome biogenesis   | not present                     |  | protein possibly involved in protein synthesis                                                                                                                                                                                | 6  |
| YMR290C | HAS1  | ribosome biogenesis   | protein synthesis;<br>module 10 |  | Putative ATP-dependent RNA helicase; localizes to both the nuclear periphery and nucleolus; highly enriched in nuclear pore complex fractions                                                                                 | 17 |
| YNL023C | FAP1  | cell cycle            | not present                     |  | Protein that binds to Fpr1p (FKBP12), conferring rapamycin resistance by competing with rapamycin for Fpr1p binding; has similarity to putative transcription factors, including D. melanogaster shuttle craft and human NFX1 | 2  |
| YNL050C |       | ribosome biogenesis   | not present                     |  |                                                                                                                                                                                                                               | 8  |
| YNL132W | KRE33 | ribosome biogenesis   | protein synthesis;<br>module 10 |  |                                                                                                                                                                                                                               | 12 |
| YNL174W |       | ribosome biogenesis   | protein synthesis;<br>module 10 |  |                                                                                                                                                                                                                               | 1  |
| YNR046W |       | ribosome biogenesis   | protein synthesis               |  | nucleolar protein                                                                                                                                                                                                             | 8  |
| YNR054C |       | ribosome biogenesis   | protein synthesis               |  | transcription regulator activity                                                                                                                                                                                              | 1  |
| YCL042W |       | metabolism            | stress                          |  |                                                                                                                                                                                                                               | 1  |
| YOL022C |       | ribosome biogenesis   | protein synthesis               |  |                                                                                                                                                                                                                               | 8  |
| YOL032W |       | mitochondrial protein | stress;                         |  |                                                                                                                                                                                                                               | 1  |

|         |       |                                                |                                  |  |                                                                                                              |    |
|---------|-------|------------------------------------------------|----------------------------------|--|--------------------------------------------------------------------------------------------------------------|----|
|         |       |                                                | module 56                        |  |                                                                                                              |    |
| YOL048C |       | cytoplasmic, protein or nucleotide degradation | stress                           |  |                                                                                                              | 2  |
| YOL079W |       | ribosome biogenesis                            | not present                      |  |                                                                                                              | 6  |
| YOL124C |       | ribosome biogenesis                            | protein synthesis                |  |                                                                                                              | 6  |
| YOR042W | CUE5  | mitochondrial protein                          | module 35                        |  | Protein containing a CUE domain that binds ubiquitin, which may facilitate intramolecular monoubiquitination | 1  |
| YOR051C |       | ribosome biogenesis                            | not present                      |  |                                                                                                              | 1  |
| YOR090C | PTC5  | mitochondrial protein                          | not present                      |  | Phosphatase type Two C                                                                                       | 1  |
| YOR146W |       | ribosome biogenesis                            | not present                      |  |                                                                                                              | 16 |
| YOR154W |       | ribosome biogenesis                            | not present                      |  |                                                                                                              | 7  |
| YOR169C |       | ribosome biogenesis                            | not present                      |  |                                                                                                              | 2  |
| YOR277C |       | ribosome biogenesis                            | module 41                        |  |                                                                                                              | 2  |
| YPL044C |       | ribosome biogenesis                            | protein synthesis; module 76     |  |                                                                                                              | 6  |
| YCR016W |       | ribosome biogenesis                            | protein synthesis                |  | nucleolar protein                                                                                            | 10 |
| YPL142C |       | protein synthesis                              | protein synthesis                |  |                                                                                                              | 2  |
| YPL146C |       | ribosome biogenesis                            | protein synthesis                |  | nucleolar protein                                                                                            | 12 |
| YPL202C | AFT2  | ribosome biogenesis                            | not present                      |  | Activator of Iron (Fe) Transcription; response to oxidative stress                                           | 2  |
| YPL207W |       | ribosome biogenesis                            | protein synthesis                |  |                                                                                                              | 8  |
| YPL212C | PUS1  | ribosome biogenesis                            | protein synthesis                |  | Involved in tRNA biogenesis                                                                                  | 1  |
| YPL225W |       | proteolytic degradation                        | not present                      |  |                                                                                                              | 1  |
| YPL238C |       | ribosome biogenesis                            | protein synthesis                |  |                                                                                                              | 1  |
| YPL239W | YAR1  | ribosome biogenesis                            | protein synthesis                |  | Null mutant is viable, grow slowly at low temperature                                                        | 5  |
| YPL273W | SAM4  | metabolism                                     | amino acid metabolism; module 68 |  | sulfur amino acid metabolism                                                                                 | 1  |
| YPR048W | TAH18 | ribosome biogenesis                            | not present                      |  |                                                                                                              | 2  |
| YPR136C |       | ribosome biogenesis                            | module 76                        |  |                                                                                                              | 1  |
| YPR142C |       | ribosome biogenesis                            | not present                      |  |                                                                                                              | 1  |
| YPR143W |       | ribosome biogenesis                            | protein synthesis                |  | nucleolar protein                                                                                            | 7  |
| YPR169W | JIP5  | ribosome biogenesis                            | not present                      |  | nucleolar protein; interact with ubiquitin-ligase Bre1p                                                      | 7  |
| YCR051W |       | ribosome biogenesis                            | module 70                        |  |                                                                                                              | 1  |
| YCR055C |       | ribosome biogenesis                            | protein synthesis                |  | "=PWP2"                                                                                                      | 9  |
| YCR072C |       | ribosome biogenesis                            | protein synthesis                |  | co-purified with 60S ribosome subunit                                                                        | 9  |

|         |       |                                                  |                     |  |                                                                                                                                                                                                                                         |    |
|---------|-------|--------------------------------------------------|---------------------|--|-----------------------------------------------------------------------------------------------------------------------------------------------------------------------------------------------------------------------------------------|----|
| YCR096C | HMRA2 | transcriptional regulator,<br>phenomone response | not present         |  | Silenced copy of A2, encoding a protein of with similarity to Alpha2p that is required along with A1p for inhibiting expression of the HO endonuclease in a/alpha HO/HO diploid cells with an active mating-type interconversion system | 2  |
| YDL023C | SRF4  | metabolism                                       | not present         |  | unlikely to encode a protein                                                                                                                                                                                                            | 1  |
| YDL063C |       | ribosome biogenesis                              | ribosome biogenesis |  |                                                                                                                                                                                                                                         | 17 |
| YDR056C |       | metabolism                                       | protein synthesis   |  | synthetic lethal to Nbp2p, a Nap1p-binding protein                                                                                                                                                                                      | 1  |
| YDR152W | GIR2  | ribosome biogenesis                              | not present         |  | Genetically Interacts with Ribosomal genes                                                                                                                                                                                              | 4  |

**Table S2: Functional predictions of unknown genes from *Shewanella* heat/cold shock dataset.**

| Gene designation | Prediction                                            | TIGR Annotation                        | # of Links |
|------------------|-------------------------------------------------------|----------------------------------------|------------|
| SO1789           | energy metabolism; transport                          | conserved hypothetical protein         | 1          |
| SO2391           | energy metabolism; transport                          | conserved hypothetical protein         | 1          |
| SO3725           | central intermediate metabolism; protein modification | hypothetical protein                   | 3          |
| SO4150           | sulfur metabolism                                     | transporter, putative                  | 2          |
| SO0119           | metabolism                                            | conserved hypothetical protein         | 2          |
| SO0126           | metabolism                                            | conserved hypothetical protein         | 3          |
| SO2011           | metabolism                                            | conserved hypothetical protein         | 3          |
| SO2017           | heat shock response                                   | conserved hypothetical protein         | 8          |
| SO2042           | heat shock response                                   | conserved hypothetical protein         | 3          |
| SO2064           | flagellar biosynthesis                                | conserved domain protein               | 3          |
| SO2354           | metabolism                                            | conserved hypothetical protein         | 3          |
| SO2375           | metabolism                                            | membrane protein, putative             | 8          |
| SO2474           | metabolism                                            | carbonic anhydrase family protein      | 3          |
| SO2500           | flagellar biosynthesis                                | conserved hypothetical protein         | 1          |
| SO3000           | flagellar biosynthesis                                | conserved hypothetical protein         | 5          |
| SO3015           | flagellar biosynthesis                                | conserved hypothetical protein         | 3          |
| SO3164           | metabolism                                            | conserved hypothetical protein         | 3          |
| SO3288           | flagellar biosynthesis                                | Transglycosylase, Slt family           | 2          |
| SO3298           | metabolism                                            | conserved hypothetical protein         | 10         |
| SO3336           | metabolism                                            | hypothetical protein                   | 4          |
| SO3896           | heat shock response                                   | outer membrane porin, putative         | 3          |
| SO4492           | metabolism                                            | conserved hypothetical protein         | 2          |
| SO4556           | metabolism                                            | transcriptional regulator, LysR family | 2          |
| SO4565           | flagellar biosynthesis                                | transporter, putative                  | 3          |
| SO0490           | metabolism                                            | transcriptional regulator              | 3          |
| SO0591           | metabolism                                            | conserved hypothetical protein         | 3          |
| SO0595           | metabolism                                            | hypothetical protein                   | 2          |
| DsbD             | metabolism                                            | thiol:disulfide interchange protein    | 5          |
| SO1125           | heat shock response                                   | Integral membrane domain protein       | 3          |
| SO2862           | amino acid metabolism                                 | HDIG domain protein                    | 2          |
| SO4051           | amino acid metabolism                                 | HlyD family secretion protein          | 2          |
| SO3696           | sulfur metabolism                                     | hypothetical protein                   | 1          |



**Table S3: Functional predictions of unknown genes from *E.coli* datasets.**

| Gene designation | Prediction                                   | Annotation*                                                                      | # of Links |
|------------------|----------------------------------------------|----------------------------------------------------------------------------------|------------|
| b1155            | biosynthesis of small molecules              | hypothetical protein                                                             | 2          |
| b1156            | biosynthesis of small molecules              | hypothetical protein                                                             | 1          |
| yafJ             | biosynthesis of small molecules              | conserved protein with N-terminal nucleophile aminohydrolase domain              | 1          |
| b0224            | biosynthesis of small molecules              | hypothetical protein                                                             | 2          |
| b2353            | biosynthesis of small molecules              | hypothetical protein                                                             | 2          |
| b2354            | biosynthesis of small molecules              | hypothetical protein                                                             | 2          |
| b2596            | degradation of amino acids                   | hypothetical protein                                                             | 2          |
| b2853            | degradation of amino acids                   | hypothetical protein                                                             | 2          |
| b3263            | degradation of amino acids                   | hypothetical protein                                                             | 2          |
| cspH             | degradation of small molecules               | cold shock-like protein, nucleic acid-binding domain                             | 2          |
| b1088            | protein synthesis                            | conserved protein of unknown function                                            | 5          |
| b1815            | transport of small molecule                  | conserved protein of unknown function                                            | 2          |
| b1933            | function related to cell surface structure   | hypothetical protein                                                             | 5          |
| yaeC             | metabolism, cell surface structure           | D-methionine transport protein (ABC superfamily, peri_bind)                      | 8          |
| b1983            | nucleotide metabolism                        | hypothetical protein                                                             | 2          |
| yejM             | translation, post-translational modification | putative sulfatase                                                               | 12         |
| b0303            | carbon compound catabolism                   | hypothetical protein                                                             | 2          |
| agaA             | post-translational modification              | putative N-acetylgalactosamine-6-phosphate deacetylase                           | 13         |
| envR             | function related to cell surface structure   | transcriptional repressor for multiple drug efflux pump (TetR/AcrR family)       | 3          |
| rhlB             | amino acid metabolism                        | putative ATP-dependent helicase with nucleoside triP hydrolase domain            | 3          |
| yihK             | nucleotide metabolism                        | putative GTP-binding factor                                                      | 4          |
| yajC             | amino acid biosynthesis                      | preprotein translocase, auxillary membrane component (General Secretory Pathway) | 6          |
| b4066            | function related to cell surface structure   | hypothetical protein                                                             | 2          |
| b4103            | function related to cell surface structure   | hypothetical protein                                                             | 4          |
| b4243            | protein translation and modification         | hypothetical protein                                                             | 5          |
| ybgF             | protein synthesis                            | putative periplasmic protein with protein prenyltransferase domain               | 9          |
| b1194            | flagellar biosynthesis                       | hypothetical protein                                                             | 2          |
| b1148            | carbon compound catabolism                   | hypothetical protein                                                             | 3          |
| b1505            | transport protein                            | putative outer membrane protein                                                  | 9          |
| b1644            | transport protein                            | putative multidrug resistance membrane protein                                   | 3          |
| b1645            | transport protein                            | hypothetical protein                                                             | 2          |

|       |                                            |                                                                                              |   |
|-------|--------------------------------------------|----------------------------------------------------------------------------------------------|---|
| b1673 | transport of small molecule                | putative aldehyde ferridoxin oxidoreductase                                                  | 7 |
| yeeP  | transport protein                          | CP4-44 prophage; putative GTP-binding factor                                                 | 2 |
| b2459 | energy metabolism; transport protein       | putative cobalamin adenosyltransferase with winged helix domain, in ethanolamine utilization | 7 |
| b2506 | function related to cell surface structure | putative membrane protein                                                                    | 3 |
| yqcB  | energy metabolism                          | pseudouridine synthase                                                                       | 6 |
| yggR  | energy metabolism; transport protein       | putative protein transport                                                                   | 3 |
| yghD  | transport protein                          | putative secretion pathway protein                                                           | 5 |
| b2970 | transport protein                          | putative protein exporter (General Secretory Pathway)                                        | 4 |
| b2973 | energy metabolism; transport protein       | hypothetical protein                                                                         | 5 |
| yraL  | energy metabolism                          | putative enzyme with Cobalt precorrin-4 methyltransferase domain                             | 2 |
| yhfP  | transport protein                          | conserved protein with Xylose isomerase-like domain                                          | 6 |
| yhjQ  | transport protein; amin acid metabolism    | putative cell division protein, nucleotide triphosphate hydrolase domain                     | 4 |
| b3832 | transport protein                          | hypothetical protein                                                                         | 8 |
| b4212 | energy metabolism; transport protein       | hypothetical protein                                                                         | 6 |
| b4256 | transport protein                          | hypothetical protein                                                                         | 3 |
| b0960 | transport protein                          | putative efflux transport protein (PET family)                                               | 2 |

\*: annotation is based on information from TIGR's *E.coli* annotation database and personal communication with Margrethe Serres, Marine Biological Laboratory, Woods Hole, MA, 02543)

## References

1. **Bar-Joseph, Z., G. K. Gerber, T. I. Lee, N. J. Rinaldi, J. Y. Yoo, F. Robert, D. B. Gordon, E. Fraenkel, T. S. Jaakkola, R. A. Young, and D. K. Gifford.** 2003. Computational discovery of gene modules and regulatory networks. *Nat Biotechnol* **21**:1337-42.
2. **Bergmann, S., J. Ihmels, and N. Barkai.** 2003. Iterative signature algorithm for the analysis of large-scale gene expression data. *Phys Rev E Stat Nonlin Soft Matter Phys* **67**:031902.
3. **Fellenberg, K., N. C. Hauser, B. Brors, A. Neutzner, J. D. Hoheisel, and M. Vingron.** 2001. Correspondence analysis applied to microarray data. *Proc Natl Acad Sci U S A* **98**:10781-6.
4. **Ihmels, J., G. Friedlander, S. Bergmann, O. Sarig, Y. Ziv, and N. Barkai.** 2002. Revealing modular organization in the yeast transcriptional network. *Nat Genet* **31**:370-7.
